# Supplementary material
Source: PubMed Central journal article supplement (PMC4711358)
Supplement: NIHMS737160-supplement-suppl_data.pdf [file NIHMS737160-supplement-suppl_data.pdf]

**Supplementary Table. Cox proportional hazards regression and logistic regression analysis for the association of risk count with biopsy reclassification stratified by the number of prostate-specific antigen velocities calculated, Johns Hopkins Active Surveillance Program 1995-2012.**

| Risk Count <sup>c</sup>               | Cox Proportional Hazards Regression |          |              |                       |          |              | Logistic Regression |          |              |                       |          |              |       |
|---------------------------------------|-------------------------------------|----------|--------------|-----------------------|----------|--------------|---------------------|----------|--------------|-----------------------|----------|--------------|-------|
|                                       | Unadjusted                          |          |              | Adjusted <sup>a</sup> |          |              | Unadjusted          |          |              | Adjusted <sup>b</sup> |          |              |       |
|                                       | HR                                  | (95% CI) | p-value      | HR                    | (95% CI) | p-value      | OR                  | (95% CI) | p-value      | OR                    | (95% CI) | p-value      |       |
| <b>3 PSAVs Calculated<sup>d</sup></b> |                                     | N=275    |              |                       |          |              |                     |          |              |                       |          |              |       |
| <b>Any Criteria</b>                   | 1                                   | 1.79     | (0.93-3.46)  | 0.081                 | 1.53     | (0.77-3.04)  | 0.229               | 1.69     | (0.81-3.50)  | 0.16                  | 1.68     | (0.76-3.72)  | 0.204 |
|                                       | 2                                   | 4.30     | (2.26-8.18)  | <0.01                 | 3.73     | (1.75-7.97)  | <0.01               | 4.72     | (2.21-10.08) | <0.01                 | 5.76     | (2.16-15.41) | <0.01 |
|                                       | 3                                   | 5.02     | (1.99-12.67) | <0.01                 | 4.63     | (1.54-13.87) | <0.01               | 7.00     | (1.92-25.50) | <0.01                 | 8.70     | (1.92-39.34) | <0.01 |
| <b>GSR<sup>e</sup></b>                | 1                                   | 1.71     | (0.70-4.22)  | 0.241                 | 1.75     | (0.70-4.38)  | 0.235               | 1.52     | (0.59-3.92)  | 0.385                 | 1.64     | (0.61-4.44)  | 0.331 |
|                                       | 2                                   | 3.16     | (1.28-7.82)  | 0.013                 | 3.96     | (1.35-11.62) | 0.012               | 3.01     | (1.16-7.82)  | 0.024                 | 4.23     | (1.33-13.46) | 0.015 |
|                                       | 3                                   | 6.41     | (1.84-22.31) | <0.01                 | 7.45     | (1.60-34.71) | 0.011               | 5.07     | (1.21-21.18) | 0.026                 | 7.52     | (1.42-39.83) | 0.018 |
| <b>2 PSAVs Calculated</b>             |                                     | N=102    |              |                       |          |              |                     |          |              |                       |          |              |       |
| <b>Any Criteria</b>                   | 1                                   | 2.25     | (0.96-5.23)  | 0.061                 | 1.91     | (0.67-5.41)  | 0.225               | 2.59     | (0.94-7.09)  | 0.065                 | 1.94     | (0.54-7.00)  | 0.313 |
|                                       | 2                                   | 2.35     | (0.95-5.87)  | 0.066                 | 1.61     | (0.46-5.58)  | 0.455               | 7.00     | (1.94-25.25) | <0.01                 | 4.65     | (0.79-27.30) | 0.089 |
| <b>GSR</b>                            | 1                                   | 3.35     | (0.71-15.72) | 0.126                 | 2.10     | (0.28-16.02) | 0.473               | 2.60     | (0.52-12.96) | 0.244                 | 1.42     | (0.20-9.90)  | 0.726 |
|                                       | 2                                   | 6.72     | (1.44-31.31) | 0.015                 | 2.84     | (0.31-25.90) | 0.356               | 10.64    | (1.97-57.44) | <0.01                 | 3.91     | (0.40-38.50) | 0.243 |
| <b>1 PSAV Calculated</b>              |                                     | N=206    |              |                       |          |              |                     |          |              |                       |          |              |       |
| <b>Any Criteria</b>                   | 1                                   | 0.99     | (0.68-1.45)  | 0.972                 | 1.71     | (1.06-2.75)  | 0.027               | 0.94     | (0.55-1.64)  | 0.838                 | 1.75     | (0.77-3.98)  | 0.184 |
| <b>GSR</b>                            | 1                                   | 2.07     | (1.16-3.68)  | 0.013                 | 2.63     | (1.32-5.25)  | <0.01               | 1.87     | (0.99-3.53)  | 0.054                 | 2.39     | (1.01-5.64)  | 0.047 |

<sup>a</sup>Cox proportional hazards regression adjusted for age at diagnosis, race, prostate-specific antigen density at diagnosis, overall prostate-specific antigen velocity during follow-up, and presence of cancer on first surveillance biopsy

<sup>b</sup>Logistic regression adjusted for age at diagnosis, race, prostate-specific antigen density at diagnosis, overall prostate-specific antigen velocity during follow-up, presence of cancer on first surveillance biopsy, and length of time periods

<sup>c</sup>Compared to patients with a total Risk Count of 0

<sup>d</sup>PSAV = prostate-specific antigen velocity

<sup>e</sup>GSR = Gleason score reclassification
